# Supplementary material for: Heterostructures of skutterudites and germanium antimony tellurides – structure analysis and thermoelectric properties of bulk samples
Source: Royal Society of Chemistry journal article supplement (doi:10.1039/c5tc01509j), 2015-01-01
Supplement: c5tc01509j1.pdf [file c5tc01509j1.pdf]

## Checkcif Report

### Datablock: FF5M21B\_K1

---

|                        |                                                    |                         |
|------------------------|----------------------------------------------------|-------------------------|
| Bond precision:        | = 0.0000 Å                                         | Wavelength=0.29460      |
| Cell:                  | a=8.9166(3)    b=8.9166(3)    c=8.9166(3)          |                         |
|                        | alpha=90        beta=90        gamma=90            |                         |
| Temperature:           | 293 K                                              |                         |
|                        | Calculated                                         | Reported                |
| Volume                 | 708.92(7)                                          | 708.93(6)               |
| Space group            | I m -3                                             | I m -3                  |
| Hall group             | -I 2 2 3                                           | -I 2 2 3                |
| Moiety formula         | Co8 Ge5.93 Sb12.24 Te5.93                          | ?                       |
| Sum formula            | Co8 Ge5.93 Sb12.24 Te5.93                          | Co Ge0.74 Sb1.53 Te0.74 |
| Mr                     | 3148.63                                            | 393.6                   |
| Dx, g cm <sup>-3</sup> | 7.375                                              | 7.375                   |
| Z                      | 1                                                  | 8                       |
| Mu (mm <sup>-1</sup> ) | 10.267                                             | 10.267                  |
| F000                   | 1338.2                                             | 1338.2                  |
| F000'                  | 1335.90                                            |                         |
| h,k,lmax               | 17,17,17                                           | 17,17,17                |
| Nref                   | 567                                                | 562                     |
| Tmin,Tmax              | 0.998,0.999                                        | 0.491,1.000             |
| Tmin'                  | 0.997                                              |                         |
| Correction method=     | # Reported T Limits: Tmin=0.491                    |                         |
| Tmax=1.000 AbsCorr =   | MULTI-SCAN                                         |                         |
| Data completeness=     | 0.991        Theta(max)= 17.133                    |                         |
| R(reflections)=        | 0.0353( 470)        wR2(reflections)= 0.0827( 562) |                         |
| S = 1.202              | Npar= 10                                           |                         |

---

The following ALERTS were generated. Each ALERT has the format

**[test-name\\_ALERT\\_alert-type\\_alert-level](#)**.

Click on the hyperlinks for more details of the test.

---

#### Alert level C

[PLAT077\\_ALERT\\_4\\_C](#) Unitcell contains non-integer number of atoms ... Please Check  
*Author's comment: This is a consequence of mixed atom sites in a disordered compound, and in addition minor rounding artifacts.*

---

#### Alert level G

[ABSMU01\\_ALERT\\_1\\_G](#) Calculation of \_exptl\_absorpt\_correction\_mu  
not performed for this radiation type.

*Author's comment: synchrotron radiation,  $\mu$  calculated with NIST database.*

[PLAT004\\_ALERT\\_5\\_G](#) Polymeric Structure Found with Maximum Dimension        1 Info

*Author's comment: correct.*

[PLAT045\\_ALERT\\_1\\_G](#) Calculated and Reported Z Differ by .....        0.13 Ratio

*Author's comment: Z was chosen so that the nominal composition of this solid.state compound corresponds to one formula unit.*

[PLAT092\\_ALERT\\_4\\_G](#) Check: Wavelength given is not Cu,Ga,Mo,Ag Ka ..        0.2946 Ang.

*Author's comment: correct, synchrotron radiation.*

[PLAT171\\_ALERT\\_4\\_G](#) The CIF-Embedded .res File Contains EADP Records        1 Report

*Author's comment: mixed cation site.*

[PLAT199\\_ALERT\\_1\\_G](#) Reported \_cell\_measurement\_temperature ..... (K)        293 Check

[PLAT200 ALERT 1 G](#) Reported `_diffn_ambient_temperature` ..... (K) 293 Check  
*Author's comment: correct, measurement at room temperature.*

[PLAT300 ALERT 4 G](#) Atom Site Occupancy of `>Sb2` is Constrained at 0.510 Check  
[PLAT300 ALERT 4 G](#) Atom Site Occupancy of `<Te2` is Constrained at 0.247 Check  
[PLAT300 ALERT 4 G](#) Atom Site Occupancy of `<Ge2` is Constrained at 0.247 Check  
[PLAT300 ALERT 4 G](#) Atom Site Occupancy of `>Sb2_a` is Constrained at 0.510 Check  
[PLAT300 ALERT 4 G](#) Atom Site Occupancy of `>Sb2_b` is Constrained at 0.510 Check  
[PLAT300 ALERT 4 G](#) Atom Site Occupancy of `>Sb2_c` is Constrained at 0.510 Check  
[PLAT300 ALERT 4 G](#) Atom Site Occupancy of `>Sb2_d` is Constrained at 0.510 Check  
[PLAT300 ALERT 4 G](#) Atom Site Occupancy of `>Sb2_i` is Constrained at 0.510 Check  
[PLAT300 ALERT 4 G](#) Atom Site Occupancy of `>Sb2_j` is Constrained at 0.510 Check  
[PLAT300 ALERT 4 G](#) Atom Site Occupancy of `>Sb2_l` is Constrained at 0.510 Check  
[PLAT300 ALERT 4 G](#) Atom Site Occupancy of `>Sb2_m` is Constrained at 0.510 Check  
[PLAT300 ALERT 4 G](#) Atom Site Occupancy of `>Sb2_n` is Constrained at 0.510 Check  
[PLAT300 ALERT 4 G](#) Atom Site Occupancy of `>Sb2_o` is Constrained at 0.510 Check  
[PLAT300 ALERT 4 G](#) Atom Site Occupancy of `>Sb2_p` is Constrained at 0.510 Check  
[PLAT300 ALERT 4 G](#) Atom Site Occupancy of `>Sb2_q` is Constrained at 0.510 Check  
[PLAT301 ALERT 3 G](#) Main Residue Disorder ..... Percentage = 44 Note

*Author's comment: all these alerts are due to the mixed cation site 24g.*

[PLAT811 ALERT 5 G](#) No ADDSYM Analysis: Too Many Excluded Atoms .... ! Info

*Author's comment: ADDSYM was done separately without assuming shared positions, no higher symmetry was found.*

[PLAT984 ALERT 1 G](#) The Co-f' = 0.191 Deviates from the B&C-Value 0.120 Check  
[PLAT984 ALERT 1 G](#) The Ge-f' = 0.287 Deviates from the B&C-Value 0.182 Check  
[PLAT984 ALERT 1 G](#) The Sb-f' = 0.054 Deviates from the B&C-Value -0.222 Check  
[PLAT984 ALERT 1 G](#) The Te-f' = -0.051 Deviates from the B&C-Value -0.345 Check  
[PLAT985 ALERT 1 G](#) The Ge-f'' = 0.361 Deviates from the B&C-Value 0.364 Check  
[PLAT985 ALERT 1 G](#) The Sb-f'' = 2.071 Deviates from the B&C-Value 2.087 Check  
[PLAT985 ALERT 1 G](#) The Te-f'' = 2.218 Deviates from the B&C-Value 2.233 Check

*Author's comment: The dispersion correction terms were taken from the NIST database, the deviations from checkcif's values are very small.*

0 **ALERT level A** = Most likely a serious problem - resolve or explain

0 **ALERT level B** = A potentially serious problem, consider carefully

1 **ALERT level C** = Check. Ensure it is not caused by an omission or oversight

31 **ALERT level G** = General information/check it is not something unexpected

## Checkcif Report

### Datablock: FF5M21B\_matrix

---

|                      |                                             |                    |
|----------------------|---------------------------------------------|--------------------|
| Bond precision:      | = 0.0000 A                                  | Wavelength=0.29460 |
| Cell:                | a=4.2348(11) b=4.2348(11) c=10.373(3)       |                    |
|                      | alpha=90 beta=90 gamma=120                  |                    |
| Temperature:         | 293 K                                       |                    |
|                      | Calculated                                  | Reported           |
| Volume               | 161.10(11)                                  | 161.10(11)         |
| Space group          | R 3 m                                       | R 3 m :h           |
| Hall group           | R 3 -2"                                     | R 3 -2"            |
| Moiety formula       | Ge2.31 Sb0.46 Te3                           | ?                  |
| Sum formula          | Ge2.31 Sb0.46 Te3                           | Ge0.77 Sb0.15 Te   |
| Mr                   | 606.56                                      | 202.19             |
| Dx,g cm-3            | 6.252                                       | 6.252              |
| Z                    | 1                                           | 3                  |
| Mu (mm-1)            | 9.051                                       | 9.051              |
| F000                 | 253.4                                       | 253.4              |
| F000'                | 252.76                                      |                    |
| h,k,lmax             | 7,7,18                                      | 7,7,18             |
| Nref                 | 283[ 143]                                   | 871                |
| Tmin,Tmax            | 0.997,0.999                                 | 0.450,1.000        |
| Tmin'                | 0.995                                       |                    |
| Correction method=   | # Reported T Limits: Tmin=0.450             |                    |
| Tmax=1.000 AbsCorr = | MULTI-SCAN                                  |                    |
| Data completeness=   | 6.09/3.08 Theta(max)= 15.361                |                    |
| R(reflections)=      | 0.0314( 871) wR2(reflections)= 0.0885( 138) |                    |
| S = 1.055            | Npar= 9                                     |                    |

---

The following ALERTS were generated. Each ALERT has the format

**[test-name\\_ALERT\\_alert-type\\_alert-level](#)**.

Click on the hyperlinks for more details of the test.

---

#### ● Alert level C

[STRVA01\\_ALERT\\_4\\_C](#) Flack test results are ambiguous.

From the CIF: `_refine_ls_abs_structure_Flack` 0.320

From the CIF: `_refine_ls_abs_structure_Flack_su` 0.040

***Author's comment: As the refinement already takes into account a 4-component twin, additional inversion twinning renders the refinement unstable. Also, the calculation of the Flack parameter is not reliable in multi-component twins. It is clear that inversion twinning is present, because twinning occurs are a consequence of a phase transition upon cooling a Fm-3m high-temperature phase.***

[PLAT077\\_ALERT\\_4\\_C](#) Unitcell contains non-integer number of atoms ... Please Check

***Author's comment: This is a consequence of mixed atom sites in a disordered compound.***

---

#### ● Alert level G

[ABSMU01\\_ALERT\\_1\\_G](#) Calculation of `_exptl_absorpt_correction_mu`

not performed for this radiation type.

***Author's comment: synchrotron radiation,  $\mu$  calculated with NIST database.***

[PLAT004\\_ALERT\\_5\\_G](#) Polymeric Structure Found with Maximum Dimension 3 Info

***Author's comment: correct.***

[PLAT021 ALERT 4 G](#) Ratio Unique / Expected Reflections too High ... 6.091  
*Author's comment: This is due to a SHELX HKLF5 refinement.*

[PLAT045 ALERT 1 G](#) Calculated and Reported Z Differ by ..... 0.33 Ratio  
*Author's comment: Z = 3 was chosen as it is a rhombohedral structure (hexagonal setting) with 3 layers per unit cell. This standard is nit detected by checkcif due to the cation disorder.*

[PLAT092 ALERT 4 G](#) Check: Wavelength given is not Cu,Ga,Mo,Ag Ka .. 0.2946 Ang.  
*Author's comment: correct, synchrotron radiation.*

[PLAT171 ALERT 4 G](#) The CIF-Embedded .res File Contains EADP Records 1 Report  
*Author's comment: mixed cation site.*

[PLAT199 ALERT 1 G](#) Reported \_cell\_measurement\_temperature ..... (K) 293 Check

[PLAT200 ALERT 1 G](#) Reported \_diffn\_ambient\_temperature ..... (K) 293 Check  
*Author's comment: correct, measurement at room temperature.*

[PLAT300 ALERT 4 G](#) Atom Site Occupancy of <Sb1 is Constrained at 0.154 Check

[PLAT300 ALERT 4 G](#) Atom Site Occupancy of >Ge1 is Constrained at 0.769 Check

[PLAT300 ALERT 4 G](#) Atom Site Occupancy of <Sb1\_a is Constrained at 0.154 Check

[PLAT300 ALERT 4 G](#) Atom Site Occupancy of <Sb1\_b is Constrained at 0.154 Check

[PLAT300 ALERT 4 G](#) Atom Site Occupancy of <Sb1\_c is Constrained at 0.154 Check

[PLAT300 ALERT 4 G](#) Atom Site Occupancy of <Sb1\_d is Constrained at 0.154 Check

[PLAT300 ALERT 4 G](#) Atom Site Occupancy of <Sb1\_e is Constrained at 0.154 Check

[PLAT300 ALERT 4 G](#) Atom Site Occupancy of <Sb1\_f is Constrained at 0.154 Check

[PLAT300 ALERT 4 G](#) Atom Site Occupancy of <Sb1\_\* is Constrained at 0.154 Check

[PLAT300 ALERT 4 G](#) Atom Site Occupancy of <Sb1\_\* is Constrained at 0.154 Check

[PLAT300 ALERT 4 G](#) Atom Site Occupancy of <Sb1\_\* is Constrained at 0.154 Check

[PLAT300 ALERT 4 G](#) Atom Site Occupancy of <Sb1\_\* is Constrained at 0.154 Check

[PLAT300 ALERT 4 G](#) Atom Site Occupancy of <Sb1\_\* is Constrained at 0.154 Check

[PLAT300 ALERT 4 G](#) Atom Site Occupancy of <Sb1\_\* is Constrained at 0.154 Check

[PLAT301 ALERT 3 G](#) Main Residue Disorder ..... Percentage = 18 Note  
*Author's comment: all these alerts are due to the mixed cation site.*

[PLAT811 ALERT 5 G](#) No ADDSYM Analysis: Too Many Excluded Atoms .... ! Info  
*Author's comment: ADDSYM was done separately without assuming shared positions, no higher symmetry was found. The space group choice is confirmed by the cations' z parameter which significantly deviates from 0.*

[PLAT984 ALERT 1 G](#) The Ge-f'= 0.287 Deviates from the B&C-Value 0.182 Check

[PLAT984 ALERT 1 G](#) The Sb-f'= 0.054 Deviates from the B&C-Value -0.222 Check

[PLAT984 ALERT 1 G](#) The Te-f'= -0.051 Deviates from the B&C-Value -0.345 Check

[PLAT985 ALERT 1 G](#) The Ge-f''= 0.361 Deviates from the B&C-Value 0.364 Check

[PLAT985 ALERT 1 G](#) The Sb-f''= 2.071 Deviates from the B&C-Value 2.087 Check

[PLAT985 ALERT 1 G](#) The Te-f''= 2.218 Deviates from the B&C-Value 2.233 Check  
*Author's comment: The dispersion correction terms were taken from the NIST database, the deviations from checkcif's values are very small.*

---

0 **ALERT level A** = Most likely a serious problem - resolve or explain

0 **ALERT level B** = A potentially serious problem, consider carefully

1 **ALERT level C** = Check. Ensure it is not caused by an omission or oversight

32 **ALERT level G** = General information/check it is not something unexpected
